# Supplementary material for: Evaluation of Oil-Absorbing Film for Imprint Desorption Electrospray Ionization Mass Spectrometry Imaging (IDESI-MSI) on Biological Samples
Source: MDPI journal article supplement (doi:10.3390/metabo14030160), 2024-03-11
Supplement: s1 [file s1]

## Supporting Information for

# **Evaluation of oil absorbing film for imprint desorption electrospray ionization mass spectrometry imaging (IDESI-MSI) on biological samples**

**Jiedong Li <sup>1</sup>, Ruolun Wei <sup>2</sup>, Yifan Meng <sup>3, \*</sup> and Richard N. Zare <sup>3, \*</sup>**

<sup>1</sup> Department of Chemistry and Biochemistry, University of California, Santa Barbara, Santa Barbara, CA 93106

<sup>2</sup> Department of Neurosurgery, Stanford University School of Medicine, Stanford, CA, 94305

<sup>3</sup> Department of Chemistry, Stanford University, Stanford, CA, 94305

\* Correspondence: Email: zare@stanford.edu; yfmeng@stanford.edu

## Contents

|                                                                                                      |      |
|------------------------------------------------------------------------------------------------------|------|
| Figure S1. Compared mass spectrum of blank imprinting material and tissue imprint.                   | p S3 |
| Figure S2. Compared mass spectrum of mouse brain tissue imprint on oil absorbing film and TLC plate. | p S4 |

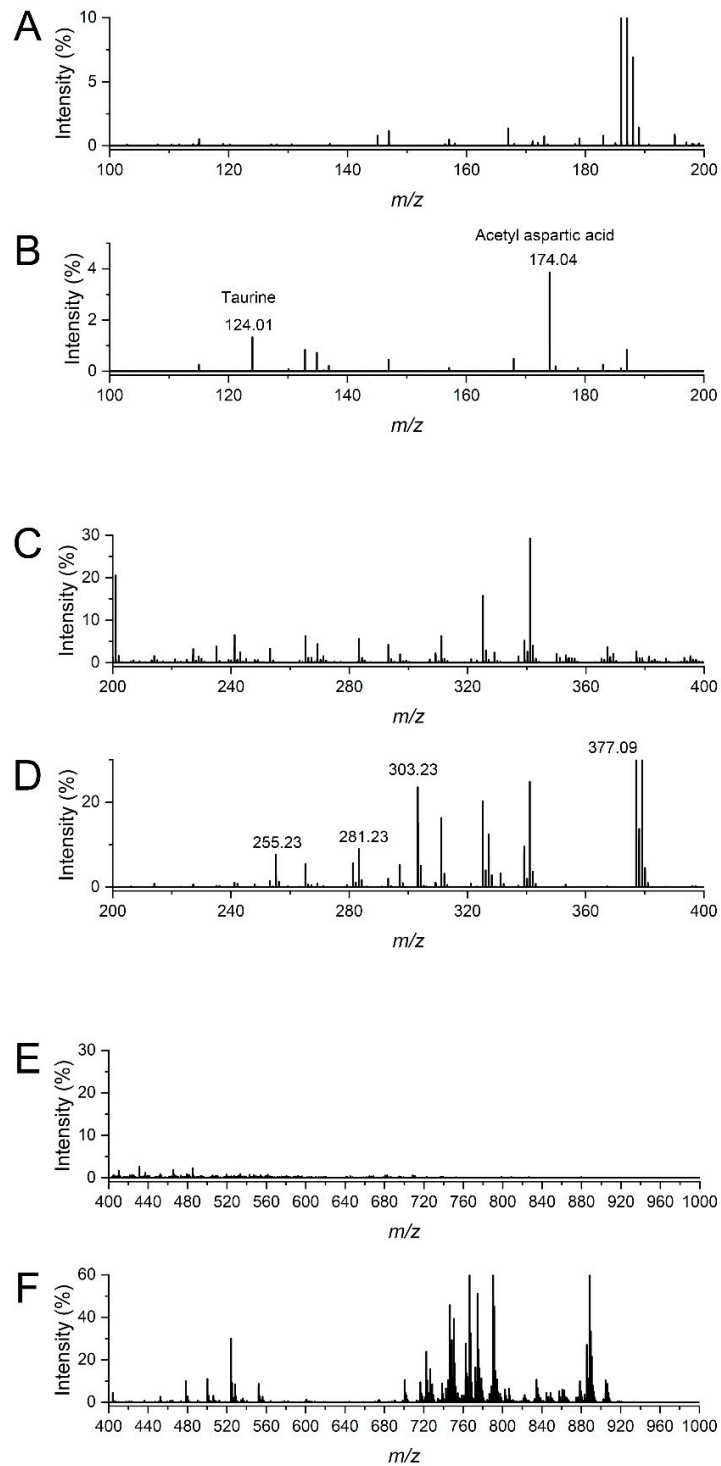

Figure S1. Compared mass spectrum of blank imprinting material and tissue imprint from  $m/z$  100 to 1000. The full mass spectrum is separated to three ranges to display. Figures A, C, and E are mass spectra from blank imprinting material. Figure B, D, and F are mass spectra from mouse brain tissue imprint.

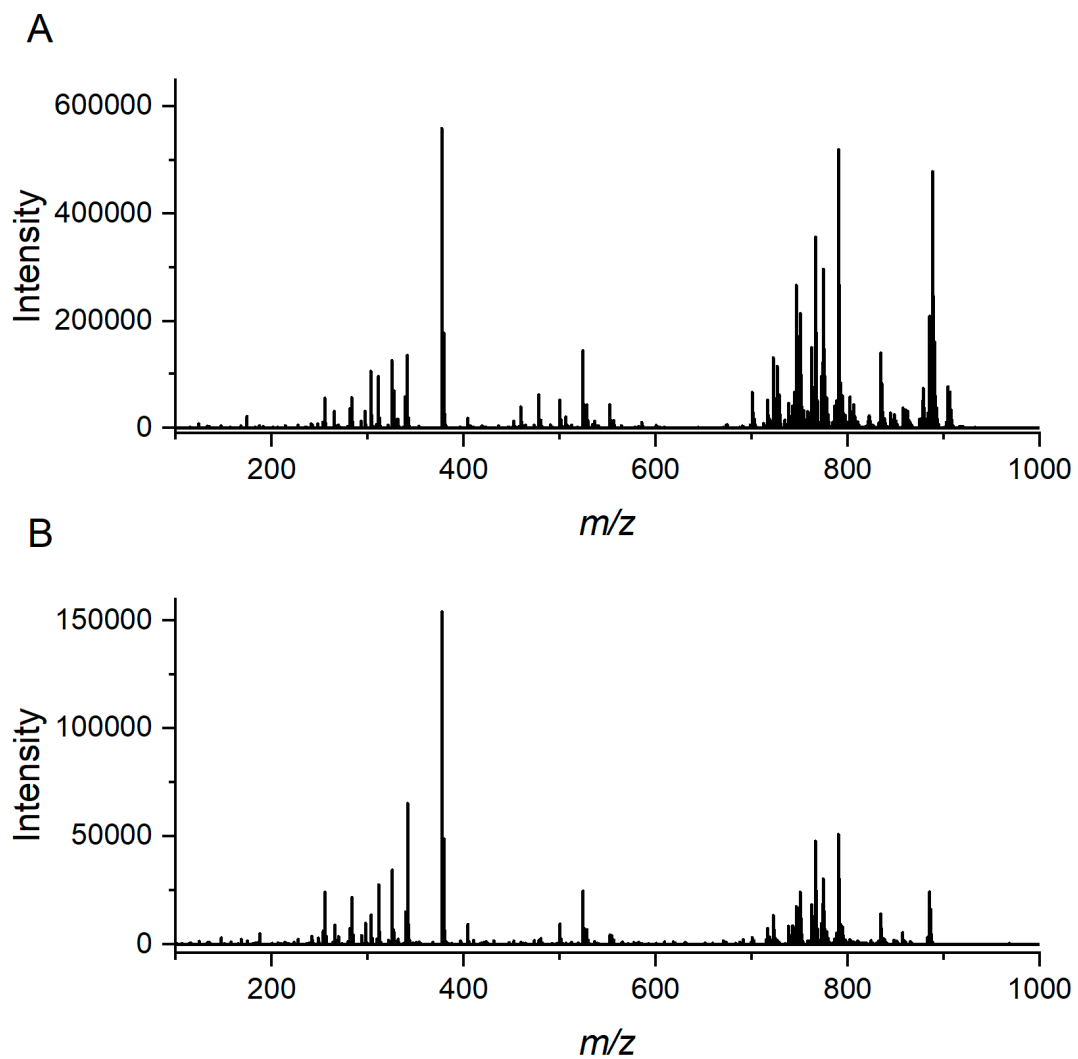

Figure S2. Compared mass spectrum of mouse brain tissue imprint on (A) oil absorbing film and (B) TLC plate.
